# Supplementary material for: Computational-Based Discovery of the Anti-Cancer Activities of Pyrrole-Based Compounds Targeting the Colchicine-Binding Site of Tubulin
Source: MDPI journal article supplement (doi:10.3390/molecules27092873), 2022-04-30
Supplement: s1 [file s1]

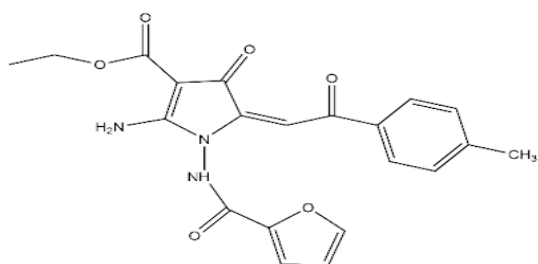

**EAPC-64**

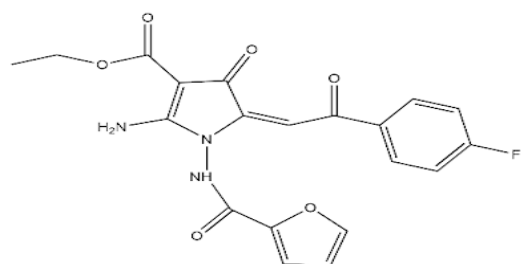

**EAPC-69**

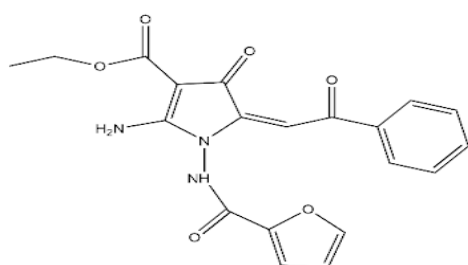

**EAPC-65**

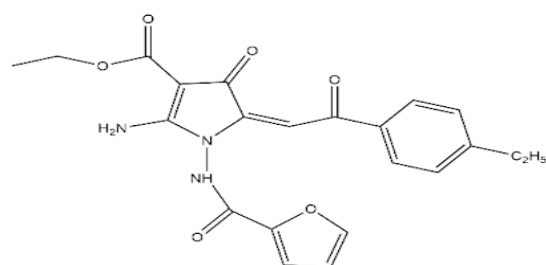

**EAPC-70**

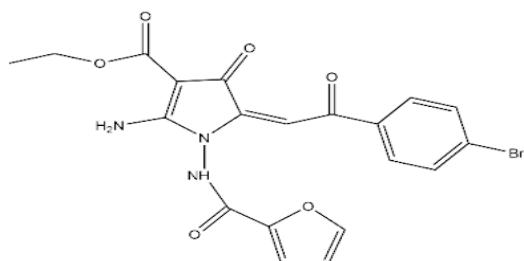

**EAPC-66**

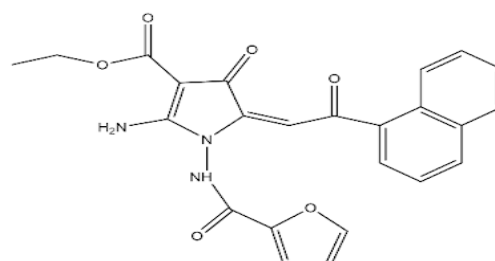

**EAPC-71**

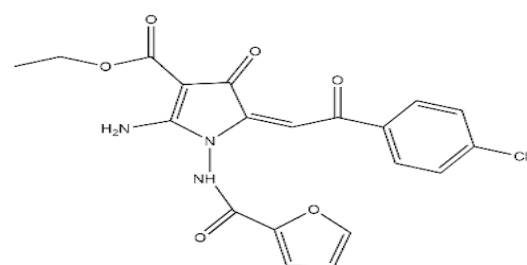

**EAPC-67**

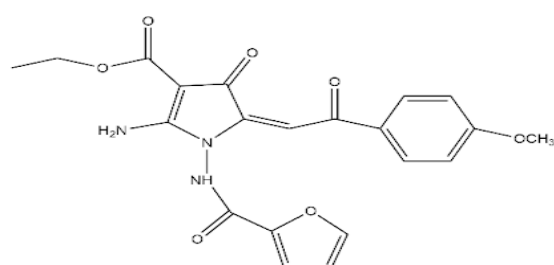

**EAPC-72**

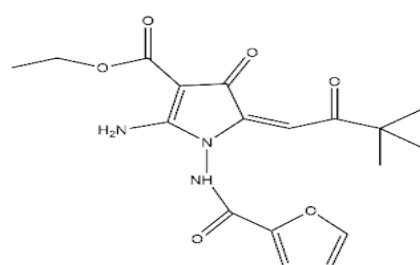

**EAPC-68**

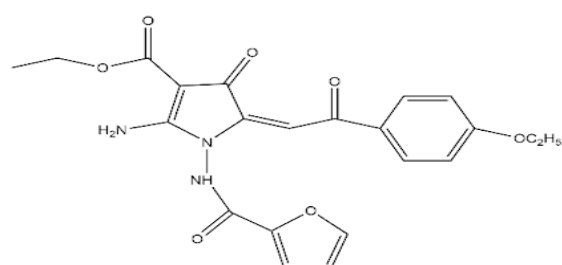

**EAPC-73**

**Supplementary Figure S1.** 2D structural formulas of synthesized EAPCs.

## Supplementary Figure S2. Spectral characteristics of synthesized EAPCs

### Ethyl (2-amino-5-(3,3-dimethyl-2-oxobutylidene)-1-(furan-2-carboxamido)-4-oxo-4,5-dihydro-1H-pyrrole-3-carboxylate (2a)

Yield 0.48 g (64%), yellow crystals, m. p. 258-259°C (ethanol). IR spectrum,  $\nu$ ,  $\text{cm}^{-1}$ : 3369, 3258, 1704, 1682, 1655, 1590.  $^1\text{H}$  NMR spectrum ( $\text{DMSO}-d_6$ ),  $\delta$ , ppm: 0.96 s (9H, t-Bu), 1.25 t (3H, Me, J 7.0 Hz), 4.18 q (2H,  $\text{CH}_2$ , J 7.1 Hz), 6.32 s (1H, CH), 6.68 double d (1H, furyl, J 3.5, 1.8), 7.27 double d (1H, furyl, J 3.5, 0.7), 7.94 double d (1H, furyl, J 1.8, 0.8), 8.38 br. s (1H, NH), 9.08 br. s (1H, NH), 10.59 br. s (1H, NH).  $^{13}\text{C}$  NMR spectrum ( $\text{DMSO}-d_6$ ),  $\delta$ , ppm: 14.51, 26.15, 58.52, 84.80, 101.38, 111.84, 115.80, 140.55, 145.26, 146.09, 156.46, 163.62, 167.26, 174.26, 204.81. Found, %: C, 57.63; H, 5.61; N, 11.23.  $\text{C}_{18}\text{H}_{21}\text{N}_3\text{O}_6$ . Calculated, %: C, 57.59; H, 5.64; N, 11.19.

### Ethyl 2-amino-1-(furan-2-carboxamido)-4-oxo-5-(2-oxo-2-phenylethylidene)-4,5-dihydro-1H-pyrrole-3-carboxylate (2b)

Yield 0.49 g (62%), yellow crystals, m. p. 240-241°C (ethanol). IR spectrum,  $\nu$ ,  $\text{cm}^{-1}$ : 3354, 3330, 3121, 1694, 1660, 1627, 1608.  $^1\text{H}$  NMR spectrum ( $\text{DMSO}-d_6$ ),  $\delta$ , ppm: 1.25 t (3H, Me, J 7.1 Hz), 4.19 q (2H,  $\text{CH}_2$ , J 7.1 Hz), 6.64 s (1H, CH), 6.60 double d (1H, furyl, J 3.5, 1.5), 7.09 d (1H, furyl, J 3.4), 7.57 m (5H<sub>arom.</sub>), 7.83 double d (1H, furyl, J 1.6, 0.6), 8.38 br. s (1H, NH), 9.07 br. s (1H, NH), 10.66 br. s (1H, NH). Found, %: C, 60.72; H, 4.36; N, 10.61.  $\text{C}_{20}\text{H}_{17}\text{N}_3\text{O}_6$ . Calculated, %: C, 60.76; H, 4.33; N, 10.63.

### Ethyl 2-amino-1-(furan-2-carboxamido)-4-oxo-5-(2-oxo-2-(p-tolyl)ethylidene)-4,5-dihydro-1H-pyrrole-3-carboxylate (2c)

Yield 0.47 g (58%), yellow crystals, m. p. 253-254°C (ethanol). IR spectrum,  $\nu$ ,  $\text{cm}^{-1}$ : 3331, 3264, 1703, 1685, 1659, 1621, 1593.  $^1\text{H}$  NMR spectrum ( $\text{DMSO}-d_6$ ),  $\delta$ , ppm: 1.26 t (3H, Me, J 7.0 Hz), 2.34 s (3H, Me), 4.21 q (2H,  $\text{CH}_2$ , J 7.1 Hz), 6.62 m (1H, CH, 1H, furyl), 7.10 d (1H, furyl, J 3.3), 7.25 d (2H<sub>arom.</sub>, J 7.9 Hz), 7.64 d (2H<sub>arom.</sub>, J 7.9 Hz), 7.85 double d (1H, furyl, J 1.6, 0.8), 8.43 br. s (1H, NH), 9.13 br. s (1H, NH), 10.76 s (1H, NH). Spectrum of NMR  $^{13}\text{C}$  ( $\text{DMSO}-d_6$ ),  $\delta$ , ppm: 14.46, 21.04, 58.47, 84.79, 102.08, 111.66, 115.49, 128.20, 129.06, 134.64, 145.73, 156.18, 163.61, 166.98, 174.05, 189.29. Found, %: C, 61.59; H, 4.71; N, 10.22.  $\text{C}_{20}\text{H}_{17}\text{N}_3\text{O}_6$ . Calculated, %: C, 61.61; H, 4.68; N, 10.26.

### Ethyl 2-amino-5-(2-(4-ethylphenyl)-2-oxoethylidene)-1-(furan-2-carboxamido)-4-oxo-4,5-dihydro-1H-pyrrole-3-carboxylate (2d)

Yield 0.52 g (61%), yellow crystals, m. p. 249-250°C (ethanol). IR spectrum,  $\nu$ ,  $\text{cm}^{-1}$ : 3409, 3201, 3119, 1709, 1646, 1627, 1608.  $^1\text{H}$  NMR spectrum ( $\text{DMSO}-d_6$ ),  $\delta$ , ppm: 1.19 t (3H, Me, J 7.6 Hz), 1.26 t (3H, Me, J 7.0 Hz), 2.64 q (2H,  $\text{CH}_2$ , J 7.6 Hz), 4.21 q (2H,  $\text{CH}_2$ , J 7.1 Hz), 6.62 dd (1H, furyl, J 3.5, 1.8), 6.64 s (1H, CH), 7.1 d (1H, furyl, J 3.1), 7.28 d (2H<sub>arom.</sub>, J 8.3 Hz), 7.67 d (2H<sub>arom.</sub>, J 8.3 Hz), 7.85 double d (1H, furyl, J 1.6, 0.7), 8.41 br. s (1H, NH), 9.13 br. s (1H, NH), 10.76 s (1H, NH). Spectrum of NMR  $^{13}\text{C}$  ( $\text{DMSO}-d_6$ ),  $\delta$ , ppm: 14.52, 14.98, 28.14, 58.55, 84.87, 102.42, 111.73, 115.55, 127.95, 128.38, 135.19, 141.00, 145.24, 148.80, 149.76, 156.68, 163.69, 167.05, 174.13, 189.56. Found, %: C, 62.14; H, 5.04; N, 9.89.  $\text{C}_{22}\text{H}_{21}\text{N}_3\text{O}_6$ . Calculated, %: C, 62.1; H, 5.00; N, 9.92.

### Ethyl 2-amino-1-(furan-2-carboxamido)-5-(2-(4-methoxyphenyl)-2-oxoethylidene)-4-oxo-4,5-dihydro-1H-pyrrole-3-carboxylate (2e)

Yield 0.54 g (64%), yellow crystals, m. p. 240-241°C (ethanol). IR spectrum,  $\nu$ ,  $\text{cm}^{-1}$ : 3364, 3331, 3127, 1709, 1657, 1621, 1608.

$^1\text{H}$  NMR spectrum ( $\text{DMSO}-d_6$ ),  $\delta$ , ppm: 1.30 t (3H, Me, J 7.1 Hz), 3.85 s (3H, MeO), 4.24 q (2H,  $\text{CH}_2$ , J 7.1 Hz), 6.61 double d (1H, furyl, J 3.6, 1.8), 6.64 s (1H, CH), 6.97 d (2H,  $\text{H}_{\text{arom.}}$ , J 8.9 Hz), 7.1 double d (1H, furyl, J 3.5, 0.6), 7.74 d (2H,  $\text{H}_{\text{arom.}}$ , J 8.8 Hz), 7.82 double d (1H, furyl, J 1.7, 0.8), 8.27 br. s (1H, NH), 8.85 br. s (1H, NH), 10.47 s (1H, NH). Found, %: C, 59.32; H, 4.53; N, 9.86.  $\text{C}_{21}\text{H}_{19}\text{N}_3\text{O}_7$ . Calculated, %: C, 59.29; H, 4.50; N, 9.88.

**Ethyl 2-amino-5-(2-(4-ethoxyphenyl)-2-oxoethylidene)-1-(furan-2-carboxamido)-4-oxo-4,5-dihydro-1H-pyrrole-3-carboxylate (2f)**

Yield 0.62 g (70%), yellow crystals, mp. 230-231°C (ethanol). IR spectrum,  $\nu$ ,  $\text{cm}^{-1}$ : 3333, 3133, 1712, 1654, 1622, 1605.

$^1\text{H}$  NMR spectrum ( $\text{DMSO}-d_6$ ),  $\delta$ , ppm: 1.30 t (3H, Me, J 7.1 Hz), 1.37 t (3H, Me, J 6.9 Hz), 4.14 q (2H,  $\text{CH}_2$ , J 6.9 Hz), 4.21 q (2H,  $\text{CH}_2$ , J 7.1 Hz), 6.62 double d (1H, furyl, J 3.5, 1.8), 6.63 s (1H, CH), 6.95 d (2H $_{\text{arom.}}$ , J 8.3 Hz), 7.10 double d (1H, furyl, J 3.4, 0.7), 7.72 d (2H $_{\text{arom.}}$ , J 8.3 Hz), 7.82 double d (1H, furyl, J 1.6, 0.8), 8.27 br. s (1H, NH), 8.84 br. s (1H, NH), 10.47 s (1H, NH). Found, %: C, 60.15; H, 4.79; N, 9.59.  $\text{C}_{22}\text{H}_{21}\text{N}_3\text{O}_7$ . Calculated, %: C, 60.13; H, 4.82; N, 9.56.

**Ethyl 2-amino-1-(furan-2-carboxamido)-5-(2-(naphthalen-1-yl)-2-oxoethylidene)-4-oxo-4,5-dihydro-1H-pyrrole-3-carboxylate (2g)**

Yield 0.65 g (73%), yellow crystals, m. p. 272-273°C (ethanol). IR spectrum,  $\nu$ ,  $\text{cm}^{-1}$ : 3370, 3260, 3241, 1700, 1677, 1655, 1590.

$^1\text{H}$  NMR spectrum ( $\text{DMSO}-d_6$ ),  $\delta$ , ppm: 1.27 t (3H, Me, J 7.0 Hz), 4.21 q (2H,  $\text{CH}_2$ , J 7.1 Hz), 6.54 double d (1H, furyl, J 3.5, 1.7), 6.58 s (1H, CH), 7.11 double d (1H, furyl, J 3.5, 0.7), 7.53m (3H $_{\text{arom.}}$ ), 7.77 double d (1H, furyl, J 1.7, 0.7), 8.48 br. s (1H, NH), 9.20 br. s (1H, NH), 10.90 br. s (1H, NH). Spectrum of NMR  $^{13}\text{C}$  ( $\text{DMSO}-d_6$ ),  $\delta$ , ppm: 14.53, 58.59, 84.87, 104.62, 111.72, 115.71, 124.81, 125.09, 126.32, 127.61, 128.43, 129.31, 129.57, 132.87, 133.04, 135.39, 140.66, 145.19, 145.84, 156.72, 163.64, 167.19, 174.29, 192.58. Found, %: C, 64.75; H, 4.26; N, 9.46.  $\text{C}_{24}\text{H}_{19}\text{N}_3\text{O}_6$ . Calculated, %: C, 64.72; H, 4.30; N, 9.43.

**Ethyl 2-amino-5-(2-(4-bromophenyl)-2-oxoethylidene)-1-(furan-2-carboxamido)-4-oxo-4,5-dihydro-1H-pyrrole-3-carboxylate (2h)**

Yield 0.50 g (53%), yellow crystals, m. p. 275-276 °C (ethanol + dioxane). IR spectrum,  $\nu$ ,  $\text{cm}^{-1}$ : 3414, 3336, 3125, 1709.1676, 1657, 1621.

$^1\text{H}$  NMR spectrum ( $\text{DMSO}-d_6$ ),  $\delta$ , ppm: 1.25 t (3H, Me, J 7.1 Hz), 4.19 q (2H,  $\text{CH}_2$ , J 7.1 Hz), 6.57 s (1H, CH), 6.60 double d (1H, furyl, J 3.5, 1.8), 7.07 d (1H, furyl, J 3.4), 7.63 m (4H $_{\text{arom.}}$ ), 7.82 (1H, furyl), 8.34 br. s (1H, NH), 9.05 br. s (1H, NH), 10.68 br. s (1H, NH). Mass spectrum,  $m/z$  ( $I_{\text{rel.}}$ , %): 475 (97.7)  $[\text{M}]^+$ , 473 (100.0)  $[\text{M}]^+$ , 319 (51.1)  $[\text{4-BrC}_6\text{H}_4]^+$ , 291 (12.7)  $[\text{4-BrC}_6\text{H}_4\text{CO}]^+$ . Found, %: C, 50.68; H, 3.36; N, 8.89.  $\text{C}_{20}\text{H}_{16}\text{BrN}_3\text{O}_6$ . Calculated, %: C, 50.65; H, 3.40; N, 8.86.

**Ethyl 2-amino-5-(2-(4-fluorophenyl)-2-oxoethylidene)-1-(furan-2-carboxamido)-4-oxo-4,5-dihydro-1H-pyrrole-3-carboxylate (2i)**

Yield 0.48 g (58%), yellow crystals, m. p. 226-227°C (ethanol). IR spectrum,  $\nu$ ,  $\text{cm}^{-1}$ : 3365, 3228, 3131, 1692, 1667, 1634, 1597.  $^1\text{H}$  NMR spectrum ( $\text{DMSO}-d_6$ ),  $\delta$ , ppm: 1.26 t (3H, Me, J 7.1 Hz), 4.21 q (2H,  $\text{CH}_2$ , J 7.1 Hz), 6.61 s (1H, CH), 6.62 double d (1H, furyl, J 3.5, 1.5), 7.09 double d (1H, furyl, J 3.5, 0.7), 7.24m (2  $\text{N}_{\text{arom.}}$ ), 7.80 m (2  $\text{N}_{\text{arom.}}$ ), 7.85 double d (1H, furyl, J 1.7, 0.7), 8.43 br. s (1H, NH), 9.15 br. s (1H, NH), 10.79 br. s (1H, NH).  $^{13}\text{C}$  NMR spectrum ( $\text{DMSO}-d_6$ ),  $\delta$ , ppm: 14.53, 58.55, 84.88, 102.19, 111.75, 115.57, 131.12, 134.01, 141.10, 145.83, 156.65, 167.01, 173.99, 189.91. Found, %: C, 58.14; H, 3.38; N, 10.14.  $\text{C}_{20}\text{H}_{16}\text{FN}_3\text{O}_6$ . Calculated, %: C, 58.11; H, 3.90; N, 10.17.

**Ethyl 2-amino-5-(2-(4-chlorophenyl)-2-oxoethylidene)-1-(furan-2-carboxamido)-4-oxo-4,5-dihydro-1H-pyrrole-3-carboxylate (2j)**

Yield 0.47 g (55%), yellow crystals, m. p. 255-256 °C (ethanol + dioxane). IR spectrum,  $\nu$ ,  $\text{cm}^{-1}$ : 3413, 3127, 3109, 1707, 1656, 1628, 1610.

$^1\text{H}$  NMR spectrum ( $\text{DMSO}-d_6$ ),  $\delta$ , ppm: 1.25 t (3H, Me, J 7.1 Hz), 4.19 q (2H,  $\text{CH}_2$ , J 7.1 Hz), 6.60 m (1H, CH, 1H, furyl), 7.07 m (1H, furyl), 7.23 d (2 $\text{H}_{\text{arom.}}$ , J 7.9 Hz), 7.62 d (2 $\text{H}_{\text{arom.}}$ , J 7.9 Hz), 7.82 m (1H, furyl), 8.36 br. s (1H, NH), 9.05 br. s (1H, NH), 10.68 br. s (1H, NH). Found, %: C, 55.85; H, 3.38; N, 9.81.  $\text{C}_{20}\text{H}_{16}\text{ClN}_3\text{O}_6$ . Calculated, %: C, 55.89; H, 3.75; N, 9.78.
